# Supplementary material for: A novel multiplex qPCR‑HRM assay for the simultaneous detection of four abortive zoonotic agents in cattle, sheep, and goats
Source: PubMed Central journal article supplement (PMC10382562; doi:10.1038/s41598-023-39447-1), 2023-07-28
Supplement: 41598_2023_39447_MOESM1_ESM.pdf [file 41598_2023_39447_MOESM1_ESM.pdf]

**A novel multiplex qPCR-HRM assay for the simultaneous detection of four abortive zoonotic agents in cattle, sheep, and goats**

Boitumelo Magret Modise<sup>1,2\*</sup>, Sununguko Wata Mpoloka<sup>2</sup>, Tirumala Bharani Kumar Settypalli<sup>3</sup>, Joseph Hyera<sup>4</sup>, Alda Natale<sup>5</sup>, Letizia Ceglie<sup>5</sup>, Nomakorinte Gcebe<sup>6</sup>, Chandapiwa Marobela-Raborokgwe<sup>1</sup>, Gerrit Johannes Viljoen<sup>3</sup>, Giovanni Cattoli<sup>3</sup>, Charles Euloge Lamien<sup>3</sup>.

<sup>1</sup> Botswana National Veterinary Laboratory, Private Bag 0035, Gaborone, Botswana.

<sup>2</sup> University of Botswana, Department of Biological Sciences, Private Bag 00704, Gaborone, Botswana.

<sup>3</sup> Animal Production and Health Laboratory, Joint FAO/IAEA Division of Nuclear Techniques in Food and Agriculture, Department of Nuclear Sciences and Applications, International Atomic Energy Agency, Wagramer Strasse 5, P.O. Box 100, A-1400 Vienna, Austria.

<sup>4</sup> Botswana Vaccine Institute, Private Bag 0031, Gaborone, Botswana.

<sup>5</sup> Istituto Zooprofilattico Sperimentale delle Venezie (IZSVe), Viale dell'Università, 10 35020 Legnaro, Italy.

<sup>6</sup> Agricultural Research Council–Bacteriology and Zoonotic Diseases Diagnostic Laboratory, Onderstepoort Veterinary Research, Pretoria, South Africa

\*Corresponding author email: [boikensmod@gmail.com](mailto:boikensmod@gmail.com)

## Supplementary information

**Supplementary Table S1:** Samples tested by the multiplex qPCR-HRM assay for this study.

| Identification | Country  | District   | DNA. source | Species | Tm   | Pathogen | Status |
|----------------|----------|------------|-------------|---------|------|----------|--------|
| Bot 1894/2014  | Botswana | Kasane     | SC          | Bovine  | 82.8 | Brucella | Blind  |
| Bot 3354/2014  | Botswana | Gaborone   | Tissues     | Caprine | 80   | Coxiella | Blind  |
|                |          |            |             |         | 82.8 | Brucella |        |
| Bot 3065/2015  | Botswana | Gaborone   | Placenta    | Ovine   | 80.2 | Coxiella | Blind  |
|                |          |            |             |         | 82.8 | Brucella |        |
| Bot 667/2015   | Botswana | Nata       | Tissues     | Caprine | 83.4 | Brucella | Blind  |
| Bot 2881/2016  | Botswana | Pitsane    | SC          | Bovine  | 80.2 | Coxiella | Blind  |
|                |          |            |             |         | 83   | Brucella |        |
| Bot 1310/2017  | Botswana | Nata       | Tissues     | Caprine | 80.2 | Coxiella | Blind  |
|                |          |            |             |         | 82.6 | Brucella |        |
| Bot 1162/2017  | Botswana | Mochudi    | Tissues     | Caprine | 80.8 | Coxiella | Blind  |
|                |          |            |             |         | 83.4 | Brucella |        |
| Bot 1396/2017  | Botswana | Gaborone   | AF/contents | Ovine   | 80.8 | Coxiella | Blind  |
| Bot 1396/2017  | Botswana | Gaborone   | Tissues     | Ovine   | 82.8 | Brucella | Blind  |
| Bot 2756/2017  | Botswana | Ramotswa   | SC          | Caprine | 80.4 | Coxiella | Blind  |
|                |          |            |             |         | 83   | Brucella |        |
| Bot 2756/2017  | Botswana | Ramotswa   | Tissues     | Caprine | 80.6 | Coxiella | Blind  |
| Bot 2928/2017  | Botswana | Mahalapye  | Tissues     | Caprine | 80.6 | Coxiella | Blind  |
|                |          |            |             |         | 83   | Brucella |        |
| Bot 2884/2017  | Botswana | Ramotswa   | Tissues     | Caprine | 80.6 | Coxiella | Blind  |
|                |          |            |             |         | 83.2 | Brucella |        |
| Bot 1309/2017  | Botswana | Nata       | Tissues     | Caprine | 80.2 | Coxiella | Blind  |
| Bot 3616/2017  | Botswana | Ramotswa   | Placenta    | Bovine  | 80.4 | Coxiella | Blind  |
|                |          |            |             |         | 82.8 | Brucella |        |
| Bot 2930/2017  | Botswana | Mahalapye  | Tissues     | Caprine | 80.2 | Coxiella | Blind  |
|                |          |            |             |         | 82.8 | Brucella |        |
| Bot 4077/2017  | Botswana | Molepolole | Tissues     | Caprine | 80.2 | Coxiella | Blind  |
| Bot 3907/2017  | Botswana | Mahalapye  | Tissues     | Caprine | 80.2 | Coxiella | Blind  |
|                |          |            |             |         | 82.6 | Brucella |        |

|               |          |            |                      |         |      |          |       |
|---------------|----------|------------|----------------------|---------|------|----------|-------|
| Bot 1315/2017 | Botswana | Nata       | Tissues              | Caprine | 80   | Coxiella | Blind |
|               |          |            |                      |         | 82.8 | Brucella |       |
| Bot 893/2017  | Botswana | Gaborone   | Tissues              | Caprine | 80.6 | Coxiella | Blind |
| Bot 4122/2017 | Botswana | Letlhakane | Swab A               | Caprine | 81   | Coxiella | Blind |
|               |          |            |                      |         | 83.6 | Brucella |       |
| Bot 4122/2017 | Botswana | Letlhakane | Swab B               | Caprine | 81   | Coxiella | Blind |
| Bot 2757/2017 | Botswana | Ramotswa   | Tissues              | Caprine | 80.2 | Coxiella | Blind |
| Bot 807/2017  | Botswana | Ramotswa   | Tissues              | Caprine | 80.2 | Coxiella | Blind |
| Bot 1327/2018 | Botswana | Mochudi    | Tissues              | Caprine | 80.8 | Coxiella | Blind |
| Bot 4326/2019 | Botswana | Lobatse    | Tissues              | Bovine  | 80.4 | Coxiella | Blind |
|               |          |            |                      |         | 83   | Brucella |       |
| Bot 1528/2019 | Botswana | Lobatse    | Cultured tissue -DNA | Bovine  | 80.6 | Coxiella | Blind |
|               |          |            |                      |         | 83   | Brucella |       |
| Bot 1530/2019 | Botswana | Lobatse    | Cultured tissue -DNA | Bovine  | 80.6 | Coxiella | Blind |
|               |          |            |                      |         | 83.2 | Brucella |       |
| Bot 4258/2019 | Botswana | Lobatse    | Cultured tissue -DNA | Bovine  | 80.6 | Coxiella | Blind |
|               |          |            |                      |         |      |          |       |
| Bot 1676/2019 | Botswana | Ghanzi     | SC                   | Caprine | 80.2 | Coxiella | Blind |
|               |          |            |                      |         | 82.8 | Brucella |       |
| Bot 1530/2019 | Botswana | Lobatse    | Tissues              | Bovine  | 80.8 | Coxiella | Blind |
|               |          |            |                      |         | 83.4 | Brucella |       |
| Bot 3303/2019 | Botswana | Lobatse    | Tissues              | Bovine  | 80   | Coxiella | Blind |
|               |          |            |                      |         | 82.4 | Brucella |       |
| Bot 1359/2019 | Botswana | Mochudi    | Tissues              | Caprine | 79.8 | Coxiella | Blind |
|               |          |            |                      |         | 82.4 | Brucella |       |
| Bot 2859/2020 | Botswana | Lobatse    | Serum                | Bovine  | 80   | Coxiella | Blind |
|               |          |            |                      |         | 82.8 | Brucella |       |
| Bot 3090/2020 | Botswana | Gaborone   | Placenta             | Ovine   | 80.2 | Coxiella | Blind |
| Bot 2330/2020 | Botswana | Ghanzi     | Tissues              | Caprine | 80.4 | Coxiella | Blind |
| Bot 2395/2020 | Botswana | Molepolole | SC                   | Caprine | 80.6 | Coxiella | Blind |
|               |          |            |                      |         | 83   | Brucella |       |
| Bot 1109/2020 | Botswana | Gaborone   | FT                   | Ovine   | 80.8 | Coxiella | Blind |
|               |          |            |                      |         | 83.2 | Brucella |       |
| Bot 1792/2020 | Botswana | Mochudi    | SC                   | Caprine | 83   | Brucella | Blind |
| Bot 1340/2020 | Botswana | Ramotswa   | Placenta             | Ovine   | 80.4 | Coxiella | Blind |
|               |          |            |                      |         | 83   | Brucella |       |

|               |          |            |           |         |      |          |       |
|---------------|----------|------------|-----------|---------|------|----------|-------|
| Bot 2833/2020 | Botswana | Mochudi    | FT        | Caprine | 80   | Coxiella | Blind |
| Bot 2833/2020 | Botswana | Mochudi    | SC        | Caprine | 79.8 | Coxiella | Blind |
|               |          |            |           |         | 82.4 | Brucella |       |
| Bot 2138/2020 | Botswana | Mahalapye  | Tissues   | Caprine | 79.8 | Coxiella | Blind |
| Bot 1909/2020 | Botswana | Lobatse    | SC        | Ovine   | 80   | Coxiella | Blind |
| Bot 1571/2020 | Botswana | Lobatse    | Tissues A | Bovine  | 80   | Coxiella | Blind |
|               |          |            |           |         | 82.6 | Brucella |       |
| Bot 1571/2020 | Botswana | Lobatse    | Serum     | Bovine  | 82.6 | Brucella | Blind |
| Bot 1571/2020 | Botswana | Lobatse    | Tissues B | Bovine  | 80.6 | Coxiella | Blind |
| Bot 2933/2020 | Botswana | Gaborone   | Tissues   | Caprine | 80.2 | Coxiella | Blind |
|               |          |            |           |         | 83   | Brucella |       |
| Bot 2132/2020 | Botswana | Mochudi    | Tissues   | Caprine | 80   | Coxiella | Blind |
|               |          |            |           |         | 83   | Brucella |       |
| Bot 2112/2020 | Botswana | Maun       | Tissues   | Caprine | 80.4 | Coxiella | Blind |
| Bot 3175/2020 | Botswana | Shakawe    | Tissues   | Caprine | 80.4 | Coxiella | Blind |
| Bot 2046/2020 | Botswana | Ghanzi     | FT        | Caprine | 80.4 | Coxiella | Blind |
|               |          |            |           |         | 83.2 | Brucella |       |
| Bot 2256/2020 | Botswana | Ramotswa   | Tissues   | Caprine | 80.2 | Coxiella | Blind |
| Bot 2262/2020 | Botswana | Mochudi    | SC        | Caprine | 80.4 | Coxiella | Blind |
|               |          |            |           |         | 82.6 | Brucella |       |
| Bot 2262/2020 | Botswana | Mochudi    | Tissues   | Caprine | 80   | Coxiella | Blind |
| Bot 1920/2020 | Botswana | Maun       | SC        | Bovine  | 80   | Coxiella | Blind |
|               |          |            |           |         | 82.6 | Brucella |       |
| Bot 3677/2020 | Botswana | Lobatse    | Serum     | Bovine  | 80   | Coxiella | Blind |
|               |          |            |           |         | 82.6 | Brucella |       |
| Bot 2428/2020 | Botswana | Molepolole | SC        | Caprine | 80   | Coxiella | Blind |
| Bot 1883/2020 | Botswana | Molepolole | SC        | Caprine | 79.9 | Coxiella | Blind |
| Bot 2140/2020 | Botswana | Mahalapye  | Tissues   | Caprine | 80   | Coxiella | Blind |
| Bot 686/2020  | Botswana | Lobatse    | Tissues   | Bovine  | 83   | Brucella | Blind |
| Bot 3098/2020 | Botswana | Lobatse    | Milk      | Bovine  | 80.4 | Coxiella | Blind |
| Bot 2535/2020 | Botswana | Gaborone   | Milk      | Bovine  | 83.2 | Brucella | Blind |
| Bot 3350/2020 | Botswana | Lobatse    | Milk      | Bovine  | 82.6 | Brucella | Blind |
| Bot 2799/2020 | Botswana | Ghanzi     | Milk A    | Bovine  | 80.6 | Coxiella | Blind |
|               |          |            |           |         | 82.8 | Brucella |       |
| Bot 2799/2020 | Botswana | Ghanzi     | Milk B    | Bovine  | 80.8 | Coxiella | Blind |
| Bot 1560/2020 | Botswana | Lobatse    | Milk      | Bovine  | 83.2 | Brucella | Blind |
| Bot 1509/2020 | Botswana | Gaborone   | Milk      | Bovine  | 82.8 | Brucella | Blind |
| Bot 2099/2020 | Botswana | Lobatse    | Milk      | Bovine  | 80.4 | Coxiella | Blind |
| Bot 1610/2020 | Botswana | Lobatse    | Milk      | Bovine  | 80.2 | Coxiella | Blind |

|                           |          |            |         |          |      |          |       |
|---------------------------|----------|------------|---------|----------|------|----------|-------|
| Bot 2669/2020             | Botswana | Lobatse    | Milk    | Bovine   | 80.4 | Coxiella | Blind |
| Bot 2665/2020             | Botswana | Lobatse    | Milk    | Bovine   | 80.4 | Coxiella | Blind |
| Bot 1973/2020             | Botswana | Gaborone   | Milk    | Bovine   | 80.8 | Coxiella | Blind |
|                           |          |            |         |          | 83   | Brucella |       |
| Bot 1611/2020             | Botswana | Lobatse    | Milk    | Bovine   | 80.8 | Coxiella | Blind |
|                           |          |            |         |          | 83.2 | Brucella |       |
| Bot 2101/2020             | Botswana | Serowe     | Milk    | Bovine   | 80.4 | Coxiella | Blind |
|                           |          |            |         |          | 82.8 | Brucella |       |
| Bot 1632/2020             | Botswana | Gaborone   | Milk    | Bovine   | 80.2 | Coxiella | Blind |
| Bot 1728/2020             | Botswana | Gaborone   | Milk    | Bovine   | 80.4 | Coxiella | Blind |
| Bot 2533/2020             | Botswana | Gaborone   | Milk    | Bovine   | 80   | Coxiella | Blind |
| Bot 808/2021              | Botswana | Ramotswa   | Swab    | Caprine  | 80   | Coxiella | Blind |
|                           |          |            |         |          | 82.8 | Brucella |       |
| Bot 808/2021              | Botswana | Ramotswa   | WB      | Caprine  | 80.6 | Coxiella | Blind |
| Bot 808/2021              | Botswana | Ramotswa   | SC      | Caprine  | 80   | Coxiella | Blind |
| Bot 3345/2020             | Botswana | Tsabong    | Tissues | Caprine  | 80.2 | Coxiella | Blind |
| Bot 1405/2021             | Botswana | Ramotswa   | SC      | Caprine  | 80.6 | Coxiella | Blind |
| Bot 523/2021              | Botswana | Mahalapye  | FT      | Caprine  | 80.6 | Coxiella | Blind |
| Bot 1368/2021             | Botswana | Molepolole | SC      | Caprine  | 80.8 | Coxiella | Blind |
|                           |          |            |         |          | 83.2 | Brucella |       |
| Bot 1048/2021             | Botswana | Nata       | SC      | Caprine  | 80.6 | Coxiella | Blind |
| Bot 1048/2021             | Botswana | Nata       | FT      | Caprine  | 80.8 | Coxiella | Blind |
|                           |          |            |         |          | 83.2 | Brucella |       |
| Bot 952/2021              | Botswana | Gaborone   | SC      | Caprine  | 80.8 | Coxiella | Blind |
|                           |          |            |         |          | 83.4 | Brucella |       |
| Bot 952/2021              | Botswana | Gaborone   | Tissues | Caprine  | 80.4 | Coxiella | Blind |
| Bot 1175/2021             | Botswana | Nata       | SC      | Caprine  | 80.2 | Coxiella | Blind |
|                           |          |            |         |          | 82.6 | Brucella |       |
| Bot 654/2021              | Botswana | Nata       | Serum   | Bovine   | 82.8 | Brucella | Blind |
| Bot 1064/2021             | Botswana | Lobatse    | FT      | Bovine   | 83.4 | Brucella | Blind |
| Bot 33/2021               | Botswana | Lobatse    | FT      | Bovine   | 82.8 | Brucella | Blind |
| ATCC 15313<br>GLi 11/2007 | Austria  | NK         | NK      | Rabbit   | 77.6 | Listeria | known |
| ATCC 19114<br>GLi 18/2008 | Austria  | NK         | Brain   | Ruminant | 77.6 | Listeria | known |
| NCTC 10890<br>GLi 20/2008 | Austria  | NK         | Faeces  | Human    | 77.6 | Listeria | known |
| GLI 22/2008               | Austria  | NK         | NK      | Poultry  | 77.6 | Listeria | known |
| 2776-2018                 | Italy    | NK         | Cheese  | NA       | 77.8 | Listeria | known |

|                                            |             |                  |                       |                                                |      |            |       |
|--------------------------------------------|-------------|------------------|-----------------------|------------------------------------------------|------|------------|-------|
| 57448 C9-2018                              | Italy       | NK               | Foetus                | Bovine                                         | 80.6 | Coxiella   | known |
| 57448 C11-2018                             | Italy       | NK               | Foetus                | Bovine                                         | 80.8 | Coxiella   | known |
| Milk Bolzano-reference material            | Italy       | Bozen            | Milk                  | Caprine                                        | 80.8 | Coxiella   | known |
| Leptospira _ Icterohaemorrhagiae _ Bianchi | Italy       | Pavia            | Strain in EMJH medium | Man                                            | 75.8 | Leptospira | known |
| Leptospira _ Canicola _ Alarik             | Netherlands | NK               | Strain in EMJH medium | Dog                                            | 75.8 | Leptospira | known |
| Leptospira _ Grippothyphosa _ Moskva V     | Russia      | Rostov           | Strain in EMJH medium | Man                                            | 75.8 | Leptospira | known |
| Leptospira _ Copenhageni _ Wijmberg        | Netherlands | NK               | Strain in EMJH medium | Man                                            | 75.8 | Leptospira | known |
| Leptospira _ Pomona _ Pomona               | Australia   | North Queensland | Strain in EMJH medium | Man                                            | 75.8 | Leptospira | known |
| Leptospira _ Bratislava _ Riccio 2         | Italy       | Pisa             | Strain in EMJH medium | Hedgehog                                       | 75.8 | Leptospira | known |
| Leptospira _ Sejroe _ M84                  | Denmark     | NK               | Strain in EMJH medium | House mouse ( <i>Mus musculus spicilegus</i> ) | 75.6 | Leptospira | known |
| Leptospira _ Tarassovi _ Mitis Johnson     | Australia   | NK               | Strain in EMJH medium | Man                                            | 75.8 | Leptospira | known |
| Leptospira serovar Ballum strain Mus 127   | Denmark     | NK               | Strain in EMJH medium | Mouse ( <i>Mus musculus</i> )                  | 75.8 | Leptospira | known |
| Leptospira serovar Saxkoebing              | Denmark     | NK               | Strain in EMJH medium | Yellow necked field                            | 75.6 | Leptospira | known |

|                                                |           |            |                       |                                          |      |            |       |
|------------------------------------------------|-----------|------------|-----------------------|------------------------------------------|------|------------|-------|
| strain Mus 24                                  |           |            |                       | mouse<br>( <i>Apodemus flavicollis</i> ) |      |            |       |
| Leptospira serovar Hardjo strain Harjoprajitno | Indonesia | Sumatra    | Strain in EMJH medium | Man                                      | 75.8 | Leptospira | known |
| Brucella B1 625 -2019                          | Botswana  | Lobatse    | SC-DNA                | Bovine                                   | 83.2 | Brucella   | known |
| Brucella B2 646 - 2019                         | Botswana  | Lobatse    | Culture-DNA           | Bovine                                   | 83.8 | Brucella   | known |
| Brucella B3 050 - 2019                         | Botswana  | Lobatse    | Lung culture -DNA     | Bovine                                   | 83   | Brucella   | known |
| Brucella B4 652 -2019                          | Botswana  | Lobatse    | SC-DNA                | Bovine                                   | 82.8 | Brucella   | known |
| Bot 2332/2014                                  | Botswana  | Lobatse    | SC                    | Caprine                                  | NA   | Negative   | Blind |
| Bot 1024/2016                                  | Botswana  | Ramotswa   | Tissues               | Caprine                                  | NA   | Negative   | Blind |
| Bot 2929/2017                                  | Botswana  | Mahalapye  | Tissues               | Caprine                                  | NA   | Negative   | Blind |
| Bot 2947/2017                                  | Botswana  | Gaborone   | Tissues               | Caprine                                  | NA   | Negative   | Blind |
| Bot 2992/2017                                  | Botswana  | Gaborone   | Tissues               | Caprine                                  | NA   | Negative   | Blind |
| Bot 3223/2017                                  | Botswana  | Gaborone   | Tissues               | Caprine                                  | NA   | Negative   | Blind |
| Bot 3224/2017                                  | Botswana  | Kanye      | Tissues               | Caprine                                  | NA   | Negative   | Blind |
| Bot 3177/2017                                  | Botswana  | Ramotswa   | Tissues               | Caprine                                  | NA   | Negative   | Blind |
| Bot 3531/2017                                  | Botswana  | Ramotswa   | Placenta              | Caprine                                  | NA   | Negative   | Blind |
| Bot 1100/2019                                  | Botswana  | Kasane     | Tissues               | Ovine                                    | NA   | Negative   | Blind |
| Bot 3040/2019                                  | Botswana  | Molepolole | SC/Tissues            | Caprine                                  | NA   | Negative   | Blind |
| Bot 2825/2020                                  | Botswana  | Lobatse    | Milk                  | Bovine                                   | NA   | Negative   | Blind |
| Bot 1633/2020                                  | Botswana  | Gaborone   | Milk                  | Bovine                                   | NA   | Negative   | Blind |
| Bot 1760/2020                                  | Botswana  | Lobatse    | Milk                  | Bovine                                   | NA   | Negative   | Blind |
| Bot 2654/2020                                  | Botswana  | Palapye    | Milk                  | Bovine                                   | NA   | Negative   | Blind |
| Bot 2822/2020                                  | Botswana  | Lobatse    | Milk                  | Bovine                                   | NA   | Negative   | Blind |
| Bot 1608/2020                                  | Botswana  | Lobatse    | Milk                  | Bovine                                   | NA   | Negative   | Blind |
| Bot 1606/2020                                  | Botswana  | Lobatse    | Milk                  | Bovine                                   | NA   | Negative   | Blind |
| Bot 1763/2020                                  | Botswana  | Lobatse    | Milk                  | Bovine                                   | NA   | Negative   | Blind |
| Bot 1630/2020                                  | Botswana  | Gaborone   | Milk                  | Bovine                                   | NA   | Negative   | Blind |
| Bot 1644/2020                                  | Botswana  | Ramotswa   | FT                    | Caprine                                  | NA   | Negative   | Blind |
| Bot 1469/2020                                  | Botswana  | Lobatse    | Milk                  | Bovine                                   | NA   | Negative   | Blind |

|                            |              |            |                   |         |      |          |       |
|----------------------------|--------------|------------|-------------------|---------|------|----------|-------|
| Bot 2094/2020              | Botswana     | Gaborone   | Milk              | Bovine  | NA   | Negative | Blind |
| Bot 2097/2020              | Botswana     | Lobatse    | Milk              | Bovine  | NA   | Negative | Blind |
| Bot 1986/2020              | Botswana     | Gaborone   | Milk              | Bovine  | NA   | Negative | Blind |
| Bot 1766/2020              | Botswana     | Gaborone   | Milk              | Bovine  | NA   | Negative | Blind |
| Bot 3183/2020              | Botswana     | Lobatse    | Milk              | Bovine  | NA   | Negative | Blind |
| Bot 3351/2020              | Botswana     | Lobatse    | Milk              | Bovine  | NA   | Negative | Blind |
| Bot 1570/2020              | Botswana     | Gaborone   | Milk              | Bovine  | NA   | Negative | Blind |
| Bot 2175/2020              | Botswana     | Mochudi    | SC/FT             | Caprine | NA   | Negative | Blind |
| Bot 1792/2020              | Botswana     | Mochudi    | Tissues           | Caprine | NA   | Negative | Blind |
| Bot 3671/2020              | Botswana     | Lobatse    | Serum             | Bovine  | NA   | Negative | Blind |
| Bot 3676/2020              | Botswana     | Lobatse    | Serum             | Bovine  | NA   | Negative | Blind |
| Bot 1802/2020              | Botswana     | Ramotswa   | Tissues           | Caprine | NA   | Negative | Blind |
| Bot 2116/2020              | Botswana     | Maun       | Tissues           | Caprine | NA   | Negative | Blind |
| Bot 2419/2020              | Botswana     | Nata       | FT                | Caprine | NA   | Negative | Blind |
| Bot 2428/2020              | Botswana     | Molepolole | FT                | Caprine | NA   | Negative | Blind |
| Bot 902/2021               | Botswana     | Molepolole | FT                | Caprine | NA   | Negative | Blind |
| Bot 0439/2021              | Botswana     | Palapye    | WB                | Caprine | NA   | Negative | Blind |
| Bot 0735/2021              | Botswana     | Shakawe    | Tissues           | Caprine | NA   | Negative | Blind |
| Bot 0711/2021              | Botswana     | Lobatse    | Serum             | Bovine  | NA   | Negative | Blind |
| Bot 0677/2021              | Botswana     | Kanye      | Serum             | Bovine  | NA   | Negative | Blind |
| <i>Brucella abortus</i> 1  | South Africa | NK         | Bacterial culture | Bovine  | 83.0 | Brucella | known |
| <i>Brucella abortus</i> 2  | South Africa | NK         | Bacterial culture | Bovine  | 83.0 | Brucella | known |
| <i>Brucella abortus</i> 3  | South Africa | NK         | Bacterial culture | Bovine  | 83.0 | Brucella | known |
| <i>Brucella abortus</i> 7  | South Africa | NK         | Bacterial culture | Bovine  | 83.0 | Brucella | known |
| <i>Brucella abortus</i> 8  | South Africa | NK         | Bacterial culture | Bovine  | 83.0 | Brucella | known |
| <i>Brucella abortus</i> 9  | South Africa | NK         | Bacterial culture | Bovine  | 83.2 | Brucella | known |
| <i>Brucella abortus</i> 10 | South Africa | NK         | Bacterial culture | Bovine  | 83.2 | Brucella | known |
| <i>Brucella abortus</i> 11 | South Africa | NK         | Bacterial culture | Bovine  | 83.0 | Brucella | known |
| <i>Brucella abortus</i> 12 | South Africa | NK         | Bacterial culture | Bovine  | 83.0 | Brucella | known |
| <i>Brucella abortus</i> 13 | South Africa | NK         | Bacterial culture | Bovine  | 83.0 | Brucella | known |
| <i>Brucella abortus</i> 14 | South Africa | NK         | Bacterial culture | Bovine  | 83.0 | Brucella | known |
| <i>Brucella abortus</i> 15 | South Africa | NK         | Bacterial culture | Buffalo | 83.0 | Brucella | known |
| <i>Brucella abortus</i> 16 | South Africa | NK         | Bacterial culture | Bovine  | 83.0 | Brucella | known |
| <i>Brucella abortus</i> 17 | South Africa | NK         | Bacterial culture | Bovine  | 83.0 | Brucella | known |



|                                            |              |    |                   |        |      |          |       |
|--------------------------------------------|--------------|----|-------------------|--------|------|----------|-------|
| <i>Brucella abortus</i> 18                 | South Africa | NK | Bacterial culture | Bovine | 83.0 | Brucella | known |
| <i>Brucella abortus</i> 19                 | South Africa | NK | Bacterial culture | Bovine | 83.2 | Brucella | known |
| <i>Brucella abortus</i> 20                 | South Africa | NK | Bacterial culture | Bovine | 83.2 | Brucella | known |
| <i>Brucella melitensis</i> 2               | South Africa | NK | Bacterial culture | Goat   | 83.2 | Brucella | known |
| <i>Brucella melitensis</i> 3               | South Africa | NK | Bacterial culture | Goat   | 83.2 | Brucella | known |
| <i>Brucella ovis</i> 1                     | South Africa | NK | Bacterial culture | Sheep  | 83.2 | Brucella | known |
| <i>Brucella ovis</i> 2                     | South Africa | NK | Bacterial culture | Sheep  | 83.2 | Brucella | known |
| <i>Brucella ovis</i> 3                     | South Africa | NK | Bacterial culture | Sheep  | 83.2 | Brucella | known |
| <i>Brucella suis</i> 2                     | South Africa | NK | Bacterial culture | Pig    | 83.2 | Brucella | known |
| <i>Brucella suis</i> 3                     | South Africa | NK | Bacterial culture | Pig    | 83.2 | Brucella | known |
| <i>Brucella abortus</i> bv9, NCTC 10507    | UK           | NK | Bacterial culture | NK     | 83.2 | Brucella | known |
| <i>Brucella melitensis</i> 16m, NCTC 10094 | UK           | NK | Bacterial culture | NK     | 83.2 | Brucella | known |
| <i>Brucella ovis</i> 63/290, NCTC 10512    | UK           | NK | Bacterial culture | NK     | 83.2 | Brucella | known |
| <i>Brucella suis</i> bv3 686, NCTC 10511   | UK           | NK | Bacterial culture | NK     | 83.0 | Brucella | known |
| <i>Coxiella burnetii</i>                   | South Africa | NK | Tissue            | Cattle | 80.8 | Coxiella | known |
| <i>Coxiella burnetii</i> 2                 | South Africa | NK | Tissue            | Cattle | 80.8 | Coxiella | known |
| <i>Coxiella burnetii</i> 3                 | South Africa | NK | Tissue            | Cattle | 80.8 | Coxiella | known |
| <i>Coxiella burnetii</i> 4                 | South Africa | NK | Tissue            | Cattle | 80.8 | Coxiella | known |
| <i>Coxiella burnetii</i> 5                 | South Africa | NK | Tissue            | Cattle | 80.8 | Coxiella | known |
| <i>Coxiella burnetii</i> 6                 | South Africa | NK | Tissue            | Cattle | 80.8 | Coxiella | known |
| <i>Coxiella burnetii</i> 7                 | South Africa | NK | Tissue            | Cattle | 80.8 | Coxiella | known |
| <i>Coxiella burnetii</i> 8                 | South Africa | NK | Vaginal swab      | Sheep  | 80.8 | Coxiella | known |
| <i>Coxiella burnetii</i> 10                | South Africa | NK | Vaginal swab      | Sheep  | 80.8 | Coxiella | known |
| <i>Coxiella burnetii</i> 11                | South Africa | NK | Vaginal swab      | Sheep  | 80.8 | Coxiella | known |
| <i>Coxiella burnetii</i> 12                | South Africa | NK | Vaginal swab      | Sheep  | 80.8 | Coxiella | known |
| <i>Coxiella burnetii</i> 13                | South Africa | NK | Tissue            | Goat   | 80.6 | Coxiella | known |
| <i>Coxiella burnetii</i>                   | South        | NK | Tissue            | Goat   | 80.8 | Coxiella | known |

|                                                                                          |              |    |                              |      |      |            |       |
|------------------------------------------------------------------------------------------|--------------|----|------------------------------|------|------|------------|-------|
| 14                                                                                       | Africa       |    |                              |      |      |            |       |
| <i>Coxiella burnetii</i><br>15                                                           | South Africa | NK | Tissue                       | Goat | 80.6 | Coxiella   | known |
| <i>Coxiella burnetii</i><br>17                                                           | South Africa | NK | Tissue                       | Goat | 80.8 | Coxiella   | known |
| <i>Leptospira Canicola-Grippotyphosa-Hardjo-Icterohaemorrhagiae-Pomona</i><br>Bacterin 1 | South Africa | NK | Leptoferm-5 vaccine (Zoetis) | NA   | 75.8 | Leptospira | known |
| <i>Listeria monocytogenes</i> 1                                                          | South Africa | NK | Bacterial culture            | NK   | 77.6 | Listeria   | known |
| <i>Listeria monocytogenes</i> 3                                                          | South Africa | NK | Bacterial culture            | NK   | 77.4 | Listeria   | known |
| <i>Listeria monocytogenes</i> 5                                                          | South Africa | NK | Bacterial culture            | NK   | 77.6 | Listeria   | known |
| <i>Listeria monocytogenes</i> 9                                                          | South Africa | NK | Bacterial culture            | NK   | 77.6 | Listeria   | known |
| <i>Listeria monocytogenes</i> 10                                                         | South Africa | NK | Bacterial culture            | NK   | 77.6 | Listeria   | known |
| <i>Listeria monocytogenes</i> 11                                                         | South Africa | NK | Bacterial culture            | NK   | 77.6 | Listeria   | known |
| <i>Listeria monocytogenes</i> 13                                                         | South Africa | NK | Bacterial culture            | NK   | 77.6 | Listeria   | known |
| <i>Listeria monocytogenes</i> 14                                                         | South Africa | NK | Bacterial culture            | NK   | 77.6 | Listeria   | known |
| <i>Listeria monocytogenes</i> 15                                                         | South Africa | NK | Bacterial culture            | NK   | 77.6 | Listeria   | known |
| <i>Listeria monocytogenes</i> 16                                                         | South Africa | NK | Bacterial culture            | NK   | 77.6 | Listeria   | known |
| <i>Listeria monocytogenes</i> 17                                                         | South Africa | NK | Bacterial culture            | NK   | 77.6 | Listeria   | known |
| <i>Listeria monocytogenes</i> 18                                                         | South Africa | NK | Bacterial culture            | NK   | 77.6 | Listeria   | known |
| <i>Listeria monocytogenes</i> 19                                                         | South Africa | NK | Bacterial culture            | NK   | 77.6 | Listeria   | known |
| <i>Listeria monocytogenes</i> 20                                                         | South Africa | NK | Bacterial culture            | NK   | 77.6 | Listeria   | known |

Abbreviations: AF = Abdominal fluid; FT = Foetal tissues; NK = Not known; SC = Stomach contents; WB = Whole blood

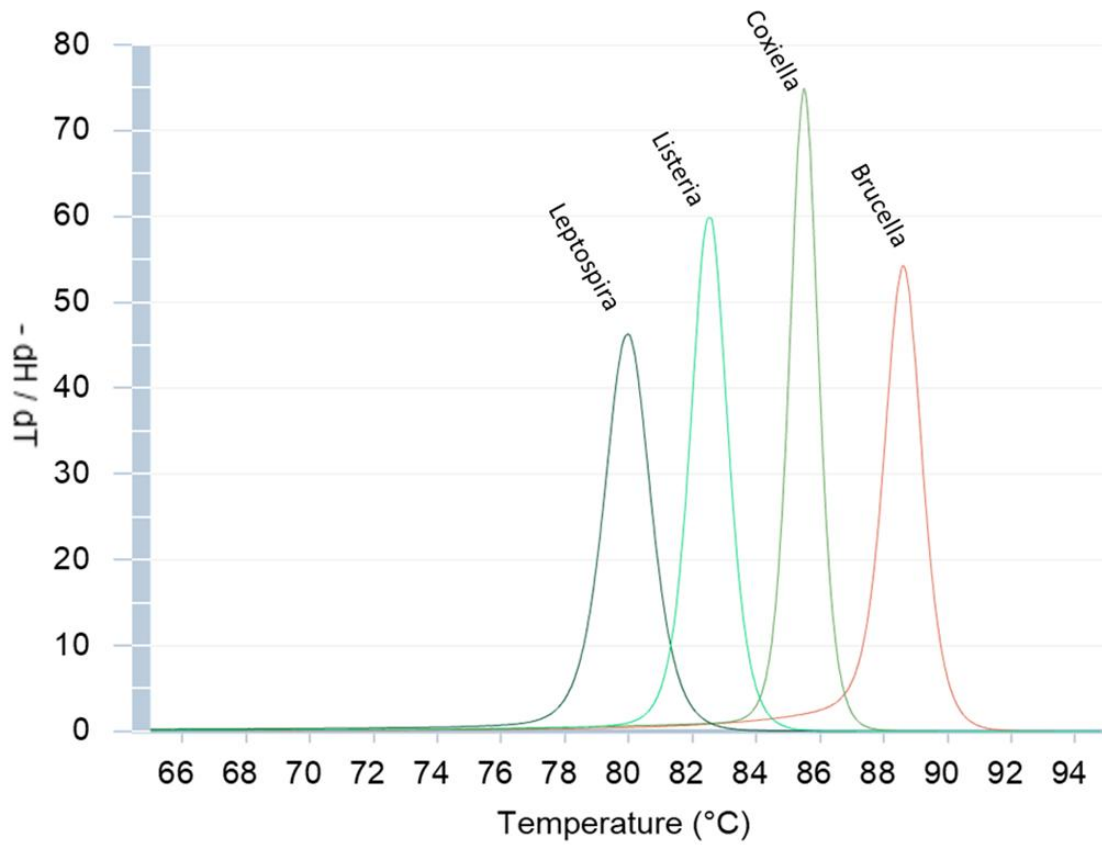

**Figure S1:** Umelt simulation graph showing melting curve, the negative derivative of the fluorescence (F) over temperature (T) ( $dF/dT$ ) against the temperature (T).

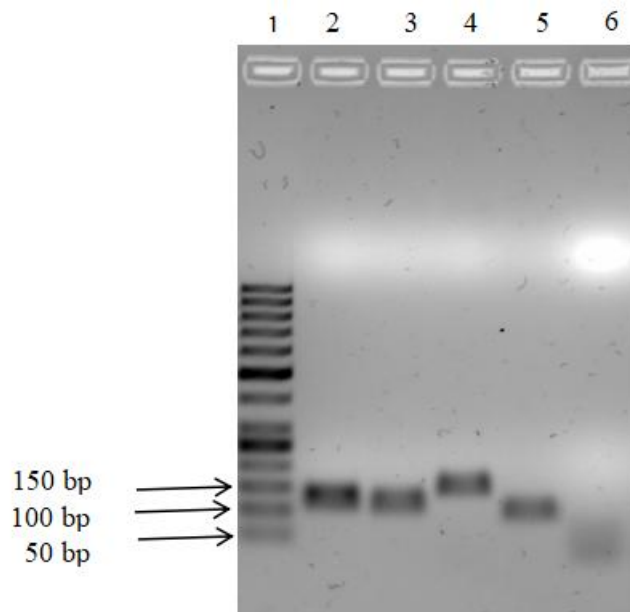

**Figure S2:** Gel picture showing the expected amplicon size of each of the primers.

Lane 1: 50-bp ladder; lane 2: *Brucella* spp. (101 bp) ; lane 3: *Listeria monocytogenes* (93 bp); lane 4: *Coxiella burnetii* (121); lane 5: *Leptospira* spp (77 bp); lane 6: Negative control without DNA.
